# Supplementary material
Source: PubMed Central journal article supplement (PMC2644129)
Supplement: 0809861105_0809861105SI.pdf [file 0809861105_0809861105SI.pdf]

# Supporting Information

Moyle *et al.* 10.1073/pnas.0809861105

## SI Results

**Phylogenetic Results.** A parameter-rich model of evolution (GTR + I + G) was selected for each partition of the data except the intron (GTR + G). Bayesian and ML approaches produced similar results (Fig. S1), although support indices differed dramatically at a few nodes. All *Yuhinas*, Philippine *Stachyris*, and Zosteropidae (except *Hypocryptadius*) formed a well-supported clade, which became the focus of diversification analysis (see below). *Yuhina* did not form a clade by itself, but rather branched off sequentially from the base of the radiation. White-eyes separated into two distinct groups in the phylogeny. Three small genera (*Lophozosterops*, *Oculocincta*, and *Cleptornis*), *Zosterops wallacei*, and the Philippine *Stachyris* formed a weakly supported clade (clade A, Fig. S1) sister to the remainder of the white-eyes. That clade received high support in all analyses (clade B, Fig. S1) and contained all *Zosterops* species except *Z. wallacei*, and species from four other genera (*Woodfordia*, *Rukia*, *Chlorocharis*, and *Speirops*) scattered among the *Zosterops*. Insertions and deletions (indels) within the nuclear intron data provided additional support for some relationships. Four indels could be mapped onto the tree unequivocally: *Macronous pilosus* and *Stachyris erythroptera* shared a 2-bp indel; clade C (*Malacopteron magnirostre*, *Napothera crassa*, *Trichastoma rufipennis*, *Kenopia striata*, and *Pellorneum capistratum*) shared a 9-bp indel; *Yuhina*, Philippine *Stachyris*, and Zosteropidae shared a 3-bp indel; and a 1-bp indel separated *Yuhina everetti*, *Yuhina castaneiceps*, and *Yuhina diademata* from the rest of this last clade. One indel could not be mapped onto the ML tree as a single event. A 6-bp indel united clade C with *Hypocryptadius cinnamomeus* and the out-group taxon, *Enicurus leschenaulti*. All analyses indicated that *Hypocryptadius* is not a white-eye and also may not be within the Timaliidae, although denser taxon sampling is necessary to decipher the relationships of this Mindanao endemic.

**Divergence Times and Diversification Rate.** The 2ln difference between likelihood scores for trees with and without a molecular clock enforced was 89.98, just over the critical value of 88 ( $n - 2$  df = 68), indicating nonclocklike evolution. Cross validation within the r8s program indicated a smoothing parameter of 3.2.

The maximum uncorrected distance (ND2) between individuals sampled from throughout Kolombangara, New Georgia, and Kohingo was 0.0077, compared to a range of 0.024–0.029

between *Z. splendidus* (Ranongga) and its sister taxon. Thus, within population diversity is as high as 32% of that seen between species. This percentage was applied to 425,000 years (the more conservative of the two island age estimates, see above) to yield a calibration of 561,000 years, a conservative maximum age of the most recent common ancestor of *Z. splendidus* and its sister clade. Finally, the node depths and confidence intervals produced with penalized likelihood were converted into age estimates by multiplying by a scaling factor of (561,000/node depth of *Z. splendidus*).

Calibration of the tree and its bootstrapped confidence interval with the age of Rannonga Island produced a range of maximum estimated ages for nodes on the phylogeny (Table S1). One previous study estimated divergence times for nodes within the white-eye radiation. Warren *et al.* (1) also used island ages to calibrate the time estimates, but they used Indian Ocean islands rather than Pacific islands. Their calibration method did not provide confidence intervals and their taxon sampling overlapped little with ours, but some comparisons are possible. The basal node in their *Zosterops* radiation was estimated at 1.84 Ma, just inside our confidence interval (1.40–1.89). The origin of a large African clade (their node 14, 1.63 Ma) also lies within our confidence interval for that node (1.29–1.74). These comparisons provide independent support that our divergence time estimates accurately reflect the general time frame of diversification in the white-eyes.

**Generation Time.** A survey of incubation times in passerine birds (2) found that 11 or 12 days was the shortest documented span, shared by a few species including several *Zosterops*. More recently a study of *Zosterops rotensis* (3) reported incubation times as short as 8 days. Specimen data from recent collections in the New Georgia group revealed immature birds (bursa of Fabricius present and skulls <100% ossified) that were already in breeding condition (enlarged testes, enlarged and convoluted oviducts, enlarged ovaries, and/or developing ova). These specimens are housed in the Burke Museum at the University of Washington and include: UWBM-63044, UWBM-63047, UWBM-66029, UWBM-68096, and UWBM-76319. Taken together, these two lines of evidence suggest that *Zosterops* have among the shortest generation times among birds and at least some species of *Zosterops* may breed within 6 months of hatching.

1. Warren BH, Bermingham E, Prys-Jones RP, Thébaud C (2006) Immigration, species radiation and extinction in a highly diverse songbird lineage: White-eyes on Indian Ocean islands. *Mol Ecol* 15:3769–3786.
2. Nice MM (1953) The question of ten-day incubation periods. *Wilson Bull* 65:81–93.

3. Amidon FA (2000) Habitat relationships and life history of the Rota bridled white-eye (*Zosterops rotensis*). Master's thesis (Virginia Polytechnic Institute and State University, Blacksburg, VA).

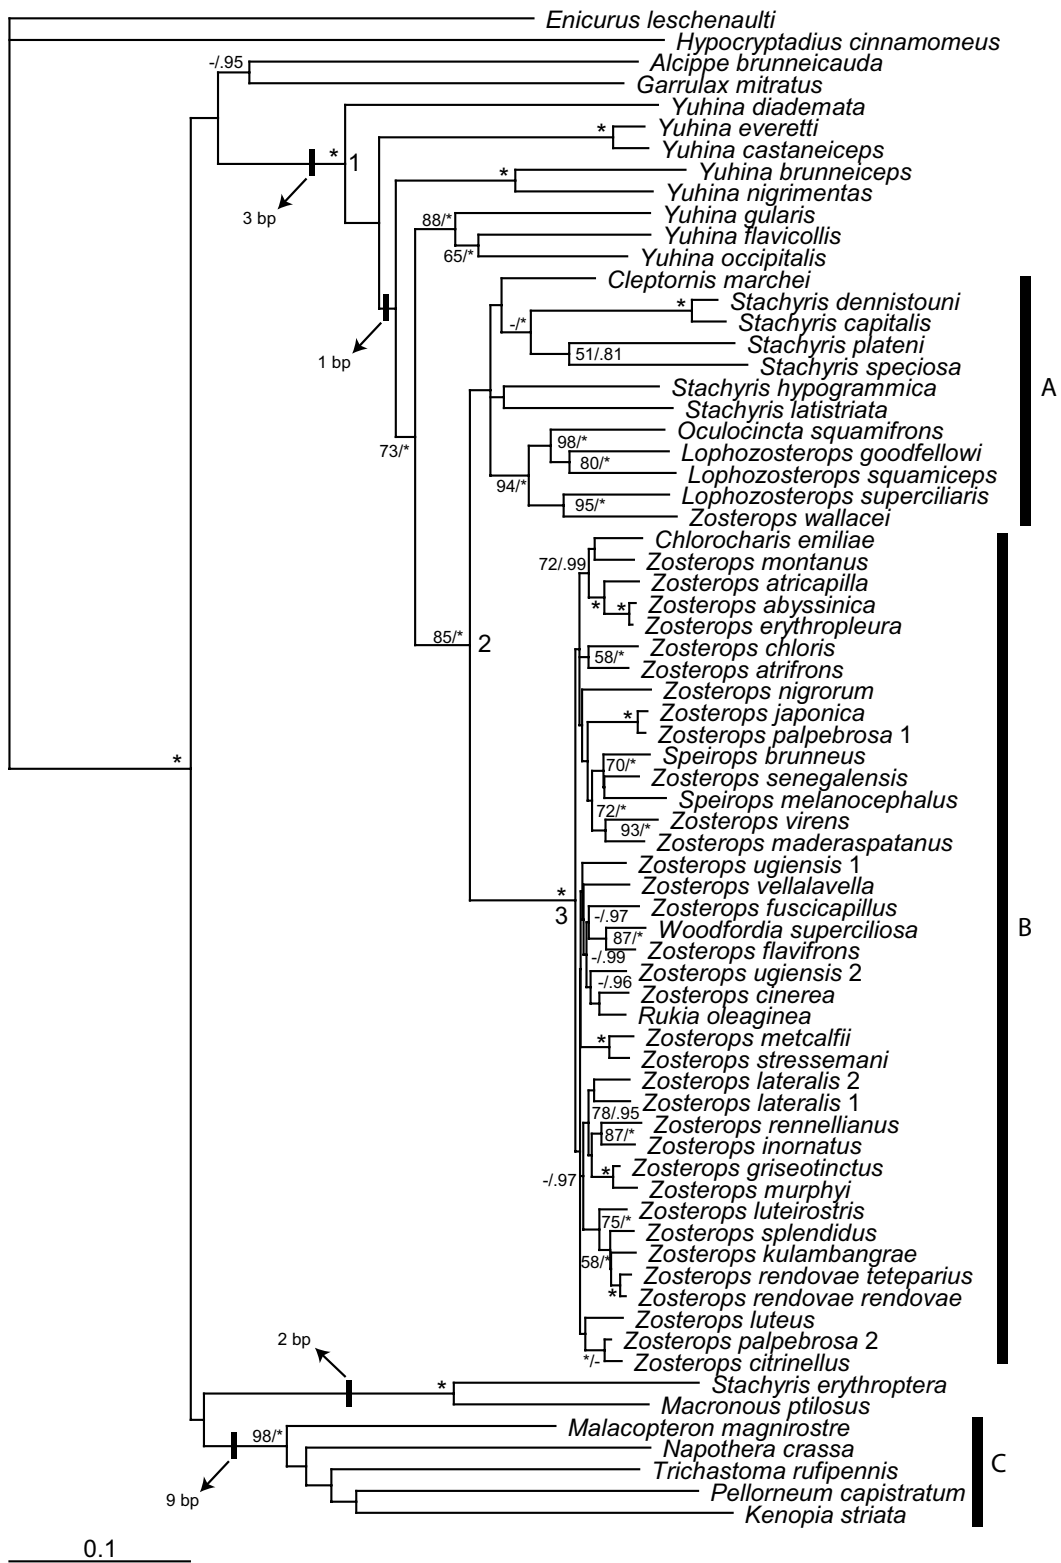

**Fig. S1.** Maximum likelihood phylogenetic estimate of white-eye relationships. Numbers at nodes indicate ML bootstrap support/Bayesian posterior probability. Asterisks (\*) indicate 100% bootstrap support or 1.0 posterior probability. Hyphens (-) indicate <50% bootstrap support or <0.95 posterior probability. Inferred insertions and deletions are mapped onto the phylogeny along with the length (in base pairs) of each indel. Labeled clades are discussed in the text. For estimated ages of numbered nodes (1–3) see Table S1.

**Table S1. Age estimate for selected nodes in the phylogeny**

| Node | Description                     | Age, Ma | Confidence interval |
|------|---------------------------------|---------|---------------------|
| 1    | <i>Yuhina</i> diversifies       | 7.19    | 6.31–8.06           |
| 2    | Zosteropidae + <i>Stachyris</i> | 5.01    | 4.46–5.57           |
| 3    | Zosterops radiation             | 1.65    | 1.40–1.89           |
|      | Origin of endemic genera:       |         |                     |
|      | <i>Chlorocharis</i>             | 1.13    | 0.88–1.39           |
|      | <i>Speirops</i>                 | 1.12    | 0.89–1.35           |
|      | <i>Rukia</i>                    | 0.76    | 0.50–1.03           |
|      | <i>Woodfordia</i>               | 0.79    | 0.61–0.97           |

Ages are maximum estimates based on penalized likelihood and island age calibration. See text for details.

Table S2. Samples included in the study

| Genus                 | Species                           | Locality                  | Source | Voucher  |
|-----------------------|-----------------------------------|---------------------------|--------|----------|
| Zosteropidae          |                                   |                           |        |          |
| <i>Zosterops</i>      | <i>erythropleura</i>              | Captive                   | LSUMNS | B20626   |
|                       | <i>japonicus</i>                  | Vietnam                   | AMNH   | DOT10981 |
|                       | <i>palpebrosus</i> 1              | Nepal                     | AMNH   | DOT5746  |
|                       | <i>palpebrosus</i> 2              | Flores Is., Indonesia     | WAM    | 23218    |
|                       | <i>nigrorum</i>                   | Luzon, Philippines        | FMNH   | 432997   |
|                       | <i>montanus</i>                   | Sulawesi, Indonesia       | AMNH   | DOT12552 |
|                       | <i>chloris</i>                    | Sulawesi, Indonesia       | AMNH   | DOT12558 |
|                       | <i>atrifrons</i>                  | Sulawesi, Indonesia       | AMNH   | DOT12620 |
|                       | <i>citrinellus</i>                | Roti Is., Indonesia       | WAM    | 23542    |
|                       | <i>wallacei</i>                   | Sumba Is., Indonesia      | WAM    | 22903    |
|                       | <i>flavifrons</i>                 | Vanuatu                   | LSUMNS | B45805   |
|                       | <i>atricapilla</i>                | Borneo                    | LSUMNS | B36444   |
|                       | <i>luteus</i>                     | Australia                 | KUNHM  | 8904     |
|                       | <i>lateralis</i> 1                | Australia                 | KUNHM  | 6094     |
|                       | <i>lateralis</i> 2                | Vanuatu                   | LSUMNS | B45835   |
|                       | <i>abyssinicus</i>                | Captive                   | LSUMNS | B20825   |
|                       | [ <i>pallidus</i> ] <i>virens</i> | South Africa              | FMNH   | 390165   |
|                       | <i>senegalensis</i>               | Ghana                     | LSUMNS | B39250   |
|                       | <i>maderaspatanus</i>             | Madagascar                | FMNH   | 345980   |
|                       | <i>metcalfi</i>                   | Choiseul, Solomon Is.     | UWBM   | 63177    |
|                       | <i>rennelianus</i>                | Rennel, Solomon Is.       | UWBM   | 69808    |
|                       | <i>stresemanni</i>                | Malaita, Solomon Is.      | UWBM   | 66034    |
|                       | <i>griseotinctus</i>              | Louisiade Is.             | NMNH   | 2003–067 |
|                       | <i>rendovae</i>                   | Rendova, Solomon Is.      | UWBM   | 76258    |
|                       | <i>rendovae</i>                   |                           |        |          |
|                       | <i>rendovae</i>                   | Tetepare, Solomon Is.     | UWBM   | 76356    |
|                       | <i>tetepare</i>                   |                           |        |          |
|                       | <i>kulambangarae</i>              | Kohingo, Solomon Is.      | UWBM   | 76278    |
|                       | <i>splendidus</i>                 | Rannonga, Solomon Is.     | AMNH   | DOT171   |
|                       | <i>luteirostris</i>               | Ghizo Is, Solomon Is.     | AMNH   | DOT113   |
|                       | <i>inornatus</i>                  | Lifou, Loyalty Is.        | AMNH   | 337461*  |
|                       | <i>cinerea</i>                    | Palau Is.                 | AMNH   | 332201*  |
|                       | <i>murphyi</i>                    | Kolombangara, Solomon Is. | AMNH   | DOT193   |
|                       | <i>fuscicapillus</i>              | Louisiade Is.             | NMNH   | 2003–062 |
|                       | <i>vellalavella</i>               | Vellalavella, Solomon Is. | AMNH   | DOT166   |
|                       | <i>ugiensis</i> 1                 | Bougainville Is.          | AMNH   | 222105*  |
|                       | <i>ugiensis</i> 2                 | Makira, Solomon Is.       | KUNHM  | 12803    |
| <i>Rukia</i>          | <i>oleaginea</i>                  | Yap Is., Micronesia       | LSUMNS | B48626*  |
| <i>Cleptornis</i>     | <i>marchei</i>                    | Saipan Is., Micronesia    | LSUMNS | B48623*  |
| <i>Woodfordia</i>     | <i>superciliosa</i>               | Rennell, Solomon Is.      | UWBM   | 58818    |
| <i>Lophozosterops</i> | <i>goodfellowi</i>                | Mindanao, Philippines     | FMNH   | 357641   |
|                       | <i>squamiceps</i>                 | Sulawesi, Indonesia       | AMNH   | DOT12549 |
|                       | <i>superciliaris</i>              | Flores, Indonesia         | WAM    | 223291   |
| <i>Oculocincta</i>    | <i>squamifrons</i>                | Borneo                    | LSUMNS | B51197   |
| <i>Chlorocharis</i>   | <i>emiliae</i>                    | Borneo                    | LSUMNS | B51361   |
| <i>Hypocryptadius</i> | <i>cinnamomeus</i>                | Mindanao, Philippines     | FMNH   | 357652   |
| <i>Speirops</i>       | <i>brunneus</i>                   | Fernando Po               | AMNH   | 706105*  |
|                       | <i>melanocephalus</i>             | Mt. Cameroon, Cameroon    | AMNH   | 461540*  |
| Timaliidae            |                                   |                           |        |          |
| <i>Yuhina</i>         | <i>everetti</i>                   | Borneo                    | LSUMNS | B36290   |
|                       | <i>nigrimentas</i>                | Vietnam                   | AMNH   | DOT12297 |
|                       | <i>brunneiceps</i>                | Taiwan                    | AMNH   | DOT5230  |
|                       | <i>occipitalis</i>                | Nepal                     | AMNH   | DOT5588  |
|                       | <i>gularis</i>                    | Nepal                     | AMNH   | DOT5639  |
|                       | <i>flavicollis</i>                | Nepal                     | AMNH   | DOT5550  |
|                       | <i>diademata</i>                  | China                     | KUNHM  | 11118    |
|                       | <i>castaniceps</i>                | China                     | KUNHM  | 6676     |
| <i>Stachyris</i>      | <i>erythroptera</i>               | Borneo                    | LSUMNS | B36417   |
|                       | <i>hypogrammica</i>               | Palawan, Philippines      | CMNH   | 37765    |
|                       | <i>dennistouni</i>                | Luzon, Philippines        | CMNH   | 38201    |
|                       | <i>plateni</i>                    | Mindanao, Philippines     | CMNH   | 37768    |
|                       | <i>speciosa</i>                   | Negros, Philippines       | CMNH   | 37091    |
|                       | <i>latistriata</i>                | Panay, Philippines        | CMNH   | 34221    |

Table S2. Cont.

| Genus               | Species             | Locality              | Source | Voucher |
|---------------------|---------------------|-----------------------|--------|---------|
|                     | <i>capitalis</i>    | Mindanao, Philippines | CMNH   | 37769   |
| <i>Garrulax</i>     | <i>mitratus</i>     | Borneo                | LSUMNS | B36460  |
| <i>Macronous</i>    | <i>ptilosus</i>     | Borneo                | LSUMNS | B36391  |
| <i>Napothera</i>    | <i>crassa</i>       | Borneo                | LSUMNS | B36469  |
| <i>Pellorneum</i>   | <i>capistratum</i>  | Borneo                | LSUMNS | B36430  |
| <i>Alcippe</i>      | <i>brunneicauda</i> | Borneo                | LSUMNS | B36359  |
| <i>Kenopia</i>      | <i>striata</i>      | Borneo                | LSUMNS | B36395  |
| <i>Trichastoma</i>  | <i>rufipennis</i>   | Ghana                 | LSUMNS | B39437  |
| <i>Malacopteron</i> | <i>magnirostre</i>  | Borneo                | LSUMNS | B36421  |
| Outgroup            |                     |                       |        |         |
| <i>Enicurus</i>     | <i>leschenaulti</i> | Borneo                | LSUMNS | B36442  |

Source abbreviations: LSMNS, Louisiana State University Museum of Natural Science; AMNH, American Museum of Natural History; WAM, Western Australian Museum; FMNH, Field Museum of Natural History; KUNHM, University of Kansas Natural History Museum; UWBM, Burke Museum University of Washington; CMNH, Cincinnati Museum of Natural History; NMNH, National Museum of Natural History.

\*Samples for which DNA was extracted from museum study skins.

**Table S3. List of published and newly developed primers used in the study**

| Primer   | Sequence (5'-3') or ref. |
|----------|--------------------------|
| L10755   | 1                        |
| H11151   | 1                        |
| L5215    | 2                        |
| ND2-SwH  | 3                        |
| H6313    | 4                        |
| TGF5     | 5                        |
| TGF6     | 5                        |
| TGF-5alt | ATCTGGGGTGATTCCCACATGC   |
| TGF-6alt | ACTCAAGTGTWTTTCTCCAGGTCC |
| Zost190H | ACTAATGCRGARGCAGCTGC     |
| Zost754H | GTTAGTGGTGGAAGTCCTGC     |
| Zost371H | CCTTGGAGGACTTCTGGRAATCA  |
| Zost351L | CAGCAATTGCAATAAAACTAGG   |

1. Chesser RT (1999) Molecular systematics of the rhinocryptid genus *Pteroptochos*. *Condor* 101:439–446.
2. Hackett SJ (1996) Molecular phylogenetics and biogeography of tanagers in the genus *Ramphocelus* (Aves). *Mol Phylogenet Evol* 5:368–382.
3. Sheldon FH, Whittingham LA, Moyle RG, Slikas B, Winkler DW (2005) Phylogeny of swallows (Aves: Hirundinidae) estimated from nuclear and mitochondrial DNA sequences. *Mol Phylogenet Evol* 35:254–270.
4. Johnson KP, Sorenson MD (1998) Comparing molecular evolution in two mitochondrial protein-coding genes (cytochrome *b* and ND2) in the dabbling ducks (Tribe: Anatini). *Mol Phylogenet Evol* 10:82–94.
5. Primmer CR, Borge T, Lindell J, Saetre GP (2002) Single-nucleotide polymorphism characterization in species with limited available sequence information: High nucleotide diversity revealed in the avian genome. *Mol Ecol* 11:603–612.
